# Supplementary material for: A heuristic predictive model for screening green entrainers comparing life cycle assessment indexes and economics
Source: Royal Society of Chemistry journal article supplement (doi:10.1039/d2gc04807h), 2023-01-01
Supplement: d2gc04807h1.pdf [file d2gc04807h1.pdf]

## **A Heuristic Predictive Model for Screening Green Entrainer**

### **Comparing Life Cycle Assessment Indexes and Economics**

#### Electronic Supplementary Information

Qinggang Xu<sup>a</sup>, Jiafu Xing<sup>a</sup>, Yuyang Jiao<sup>a</sup>, Zihao Su<sup>a</sup>, Yanli Zhang<sup>a</sup>, Peizhe Cui<sup>a</sup>,  
Jianguang Qi<sup>a</sup>, Zhaoyou Zhu<sup>a</sup>, Yinglong Wang<sup>a,\*</sup>, Yixin Ma<sup>b</sup>

<sup>a</sup> *College of Chemical Engineering, Qingdao University of Science and Technology,  
Qingdao, 266042, P. R. China*

<sup>b</sup> *College of Chemical and Environmental Engineering, Shandong University of Science  
and Technology, Qingdao, 266590, P. R. China*

**\*Corresponding Author:** Yinglong Wang

\*E-mail: wangyinglong@qust.edu.cn

College of Chemical Engineering, Qingdao University of Science and Technology  
266042, Qingdao, China

**Table S1:** The thermodynamic data of Methanol-Toluene azeotrope.

| Azeotrope         | Methanol-toluene                   |                |
|-------------------|------------------------------------|----------------|
|                   | $x_{\text{methanol}} / \text{mol}$ | Temperature /K |
| Experimental data | 0.8820-0.8860                      | 336.41-336.95  |
| NRTL model        | 0.887                              | 337.02         |
| UNIQUAC model     | 0.8843                             | 336.91         |

**Table S2:** The method of accounting the necessary parameters to evaluate TAC.

| Project           | Content                                                                                                                              | Unit                                                |
|-------------------|--------------------------------------------------------------------------------------------------------------------------------------|-----------------------------------------------------|
| ID                | Aspen tray sizing                                                                                                                    | m                                                   |
| H                 | $0.61 \times (\text{NT}/0.75 - 3) + 6$                                                                                               | m                                                   |
| Column shell cost | $C_1 = \left(\frac{M\&S}{280}\right) \times 937.636 \times D^{1.066} \times H^{0.802} \times (2.18 + F_C)$                           | \$                                                  |
|                   | $F_C = F_m \cdot F_p$ , $F_m = 3.67$ , $F_p = 1.05$ , $P \leq 6.8 \text{ atm}$ ; $F_p = 1.00$ , $P \leq 3.4 \text{ atm}$             |                                                     |
| $A_C$             | $A_C = \frac{Q_C}{K_C \Delta T_C}$                                                                                                   | $\text{m}^2$                                        |
| $K_C$             | 0.852                                                                                                                                | $\text{kW} \cdot \text{m}^{-2} \cdot \text{K}^{-1}$ |
| EH cost           | $C_2 = \left(\frac{M\&S}{280}\right) \times 474.668 \times A^{0.65} \times (2.29 + F_C)$                                             | \$                                                  |
|                   | $F_C = (F_d + F_p) \cdot F_m$ , $F_m = 3.75$ , $F_d = 1.35$ (kettle reboiler), $F_d =$ (fixed tube sheet heat exchangers), $F_p = 0$ |                                                     |
| $A_R$             | $A_R = \frac{Q_R}{K_R \Delta T_C}$                                                                                                   | $\text{m}^2$                                        |
| $K_R$             | 0.568                                                                                                                                | $\text{kW} \cdot \text{m}^{-2} \cdot \text{K}^{-1}$ |
| Energy costs      |                                                                                                                                      |                                                     |
| LP steam /433 K)  | 7.78                                                                                                                                 | $\text{\$} \cdot \text{GJ}^{-1}$                    |
| MP steam /457 K   | 8.22                                                                                                                                 | $\text{\$} \cdot \text{GJ}^{-1}$                    |
| HP steam /537 K   | 9.88                                                                                                                                 | $\text{\$} \cdot \text{GJ}^{-1}$                    |
| M&S               | 1431.7                                                                                                                               |                                                     |
| Membrane Material |                                                                                                                                      |                                                     |
| Cost              | $327.62 \times A_M$                                                                                                                  | \$                                                  |
| Vacuum Pump Cost  | $C_3 = 4200 \times \left(\frac{60 \times F_p \times 8.314 \times 273.15}{3600 \times 101.325}\right)^{0.55}$                         | \$                                                  |
| $F_p$             | Aspen simulation results                                                                                                             | $\text{kmol} \cdot \text{h}^{-1}$                   |
| TAC               | $TAC = \frac{\text{capital cost}}{\text{payback period}} + \text{energy cost}$                                                       | $\text{\$} \cdot \text{y}^{-1}$                     |
| Payback period    | 3                                                                                                                                    | years                                               |

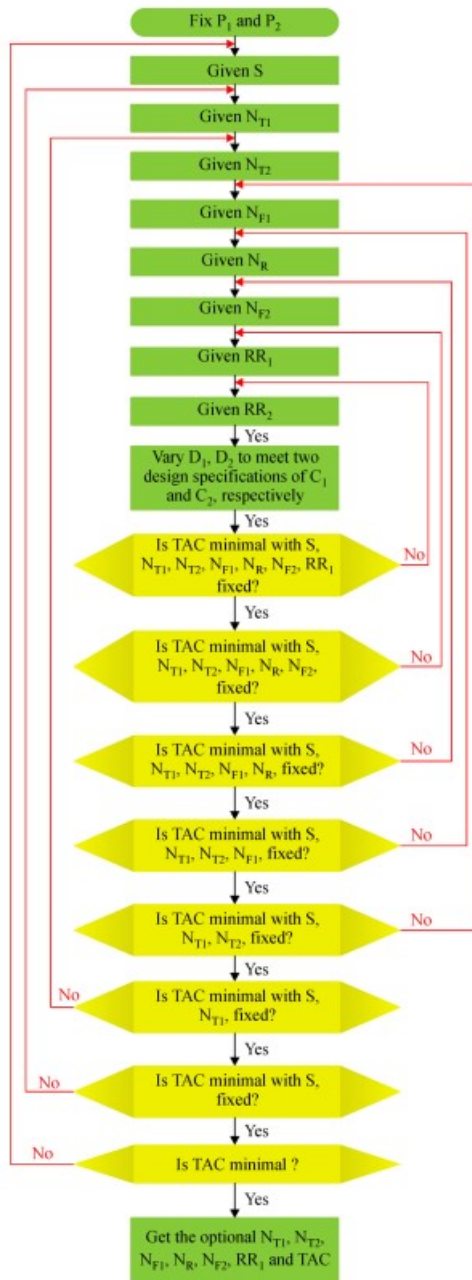

Fig. S1 The simulated and optimized procedure of the extractive distillation process.

**Table S3:** The detailed life cycle inventory of each entrainer for separating TOL+META azeotropes with the extractive distillation process.

| Project | Unit                                   | NMP     | Aniline | DMF     | Styrene | o-xylene | p-xylene | m-xylene |
|---------|----------------------------------------|---------|---------|---------|---------|----------|----------|----------|
| GWP     | kg·y <sup>-1</sup> CO <sub>2</sub> Eq. | 289.703 | 281     | 285.973 | 335.708 | 345.655  | 407.781  | 494.128  |
| AP      | kg·y <sup>-1</sup> SO <sub>2</sub> Eq. | 0.5176  | 0.5021  | 0.511   | 0.5998  | 0.6176   | 0.7287   | 0.8775   |
| HTP     | kg DCB Eq.                             | 8.9837  | 8.7138  | 8.8681  | 10.4103 | 10.7188  | 12.6447  | 15.2299  |
| FETP    | kg DCB Eq.                             | 0.1545  | 0.1499  | 0.1525  | 0.1791  | 0.1844   | 0.2175   | 0.262    |
| TETP    | kg DCB Eq.                             | 0.1611  | 0.1563  | 0.159   | 0.1867  | 0.1922   | 0.2268   | 0.2731   |
| TEDI    |                                        | 0.56    | 0.58    | 0.79    | 1.62    | 1.74     | 2.75     | 2.81     |
| LTEDI   | □                                      | 0.3815  | 0.4156  | 0.5319  | 0.7431  | 0.7772   | 0.9981   | 1.0178   |

**Table S4:** The detailed life cycle inventory of each entrainer for separating ACT+META azeotropes with the extractive distillation process.

| Project | Unit                                   | MEA      | DMSO     | Water    | DMF      | Ethanol |
|---------|----------------------------------------|----------|----------|----------|----------|---------|
| GWP     | kg·y <sup>-1</sup> CO <sub>2</sub> Eq. | 273.415  | 353.737  | 516.617  | 487.398  | 1883.69 |
| AP      | kg·y <sup>-1</sup> SO <sub>2</sub> Eq. | 0.488513 | 0.632023 | 0.923043 | 0.870837 | 3.36561 |
| HTP     | kg DCB Eq.                             | 8.4786   | 10.9694  | 16.0203  | 15.1142  | 58.4134 |
| FETP    | kg DCB Eq.                             | 0.1458   | 0.1887   | 0.2756   | 0.26     | 1.0048  |
| TETP    | kg DCB Eq.                             | 0.152    | 0.1967   | 0.2873   | 0.271    | 1.0495  |
| TEDI    |                                        | 1.06     | 2.21     | 4.5      | 7.32     | 12.77   |
| LTEDI   | □                                      | 0.5209   | 0.7985   | 1.4536   | 1.6221   | 2.8898  |

**Table S5:** The theoretical derivation formula for process assumption of the TAC model of Zhu et al..

|                                                                                                                                                                                    |
|------------------------------------------------------------------------------------------------------------------------------------------------------------------------------------|
| $V_i = D + L = D_i \times (R_{i+1})$                                                                                                                                               |
| $F(\text{TAC})_i = C_1 \times N_i \times V_i$                                                                                                                                      |
| $R_{i,\min} = \frac{1}{ \alpha_i - 1 } \times \frac{x_{D,LK}}{(x_{F,LK} - \alpha_i \times \frac{x_{D,HK}}{x_{F,HK}})} = \frac{1}{ \alpha_i - 1 } \times \frac{x_{D,LK}}{x_{F,LK}}$ |
| $R_{i,\min} = \frac{C_2 \times 1}{ \alpha_i - 1 }$                                                                                                                                 |
| $V_i \approx \frac{C_3}{ \alpha_i - 1 }$                                                                                                                                           |
| $N_{i,\min} = \frac{\log_{10} \left( \frac{x_{D,LK}}{x_{D,HK}} \times \frac{x_{W,HK}}{x_{W,LK}} \right)}{\log_{10} \alpha_i} = \frac{C_4 \times 1}{\log_{10} \alpha_i}$            |
| $N_i = \frac{C_5 \times C_4}{\log_{10} \alpha_i}$                                                                                                                                  |
| $F(\text{TAC})_i = C_1 \times N_i \times V_i = C_1 \times C_2 \times C_3 \times C_4 \times C_5 \times \frac{1}{ \alpha_i - 1 } \times \frac{1}{\log_{10} \alpha_i}$                |
| $\frac{C}{ \alpha_i - 1  \log_{10} \alpha_i}$                                                                                                                                      |
| $F(\text{TAC}) = \sum_{i=1}^n \frac{C}{ \alpha_i - 1  \log_{10} \alpha_i} \quad (i=1,2,\dots,n)$                                                                                   |
